# Supplementary material for: Hollow tungsten carbide/carbon sphere promoted Pt electrocatalyst for efficient methanol oxidation
Source: Royal Society of Chemistry journal article supplement (doi:10.1039/c4ra08184f), 2014-12-08
Supplement: c4ra08184f1.pdf [file c4ra08184f1.pdf]

### Supporting information

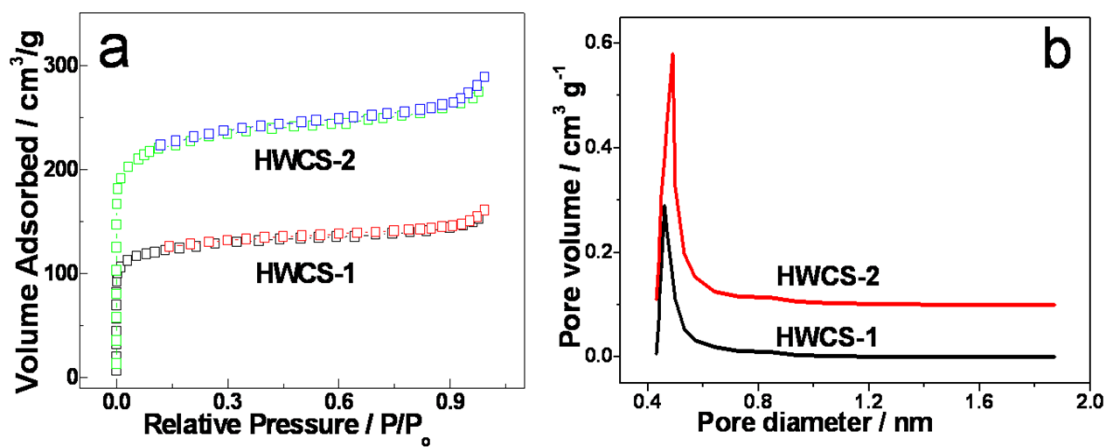

Figure S1(a) N<sub>2</sub> adsorption-desorption isotherms and (b) pore size distributions on HWCS-1 and HWCS-2.
